# Supplementary material
Source: PubMed Central journal article supplement (PMC3625370)
Supplement: NIHMS431543-supplement-01.pdf [file NIHMS431543-supplement-01.pdf]

**TABLE S1** Mullen Scales of Early Learning (MSEL) Developmental Quotient (DQ) by Risk Group and Sex, Controlling for Maternal Education

| Outcome Variable   | Fixed effects      | Estimate (SE)    |
|--------------------|--------------------|------------------|
| MSEL Verbal DQ     | Intercept          | 110.88 (2.84)*** |
|                    | Site 2             | -7.48 (4.03)     |
|                    | Site 3             | -7.14 (2.12)***  |
|                    | Site 4             | -4.03 (2.17)     |
|                    | Site 5             | 1.21 (2.90)      |
|                    | Site 6             | -2.64 (4.74)     |
|                    | Maternal education | 8.05 (2.06)***   |
| MSEL Nonverbal DQ  | Risk               | -6.79 (1.73)***  |
|                    | Sex                | -7.70 (1.59)***  |
|                    | Intercept          | 109.70 (2.87)*** |
|                    | Site 2             | -0.20 (4.07)     |
|                    | Site 3             | -0.94 (2.13)     |
|                    | Site 4             | 5.19 (2.19)*     |
|                    | Site 5             | 18.10 (2.92)***  |
| Site 6             | -2.66 (4.79)       |                  |
| Maternal education | 4.78 (2.08)*       |                  |
| Risk               | -3.48 (1.75)*      |                  |
| Sex                | -9.00 (1.60)***    |                  |

Note: Risk indexes the high risk group. Sex indexes male. Maternal education indexes attainment of at least a college degree (versus a lower level of attainment).

\*p < .05; \*\*p < .01; \*\*\*p < .001.

**TABLE S2** Latent Class Analysis (LCA) Model Fit Statistics

| LCA Solution  | BIC      | AIC      | -2LL     |
|---------------|----------|----------|----------|
| Two classes   | 12685.39 | 12636.25 | 12614.24 |
| Three classes | 12565.07 | 12489.12 | 12455.12 |
| Four classes  | 12524.38 | 12421.62 | 12375.62 |
| Five classes  | 12501.74 | 12372.18 | 12314.18 |
| Six classes   | 12488.29 | 12331.92 | 12261.92 |
| Seven classes | 12488.24 | 12305.06 | 12223.06 |
| Eight classes | 12488.26 | 12278.28 | 12184.28 |

Note: -2LL = log likelihood; AIC = Akaike information criterion; BIC = Bayesian information criterion

**TABLE S3** Mullen Scales of Early Learning (MSEL) T-Scores for Latent Classes

| Latent class             | MSEL Subscale    |            |                    |                     |
|--------------------------|------------------|------------|--------------------|---------------------|
|                          | Visual Reception | Fine Motor | Receptive Language | Expressive Language |
| 1. Low ASD severity      | 69.51            | 62.01      | 61.18              | 61.11               |
| High DQ                  | (7.32)           | (10.72)    | (8.26)             | (6.56)              |
| 2. Low ASD severity      | 56.30            | 48.28      | 49.15              | 52.28               |
| Average DQ               | (8.76)           | (10.36)    | (6.17)             | (5.47)              |
| 3. Elevated ASD severity | 63.96            | 54.86      | 58.35              | 57.78               |
| High DQ                  | (7.60)           | (10.44)    | (7.34)             | (6.23)              |
| 4. Low ASD severity      | 43.95            | 39.00      | 40.69              | 40.26               |
| Low DQ                   | (14.45)          | (12.31)    | (11.36)            | (9.09)              |
| 5. Elevated ASD severity | 45.97            | 41.75      | 44.35              | 47.03               |
| Low-Average DQ           | (11.37)          | (9.43)     | (7.16)             | (6.57)              |

Note: Values are mean (SD). T-Scores are normalized with mean = 50 (SD = 10). ASD = autism spectrum disorder, DQ = developmental quotient.
